# Supplementary material for: A Study of the Effect of 5 at.% Sn on the Micro-Structure and Isothermal Oxidation at 800 and 1200 °C of Nb-24Ti-18Si Based Alloys with Al and/or Cr Additions
Source: PubMed Central journal article supplement (PMC6981790; doi:10.3390/ma13010245), 2020-01-06
Supplement: materials-13-00245-s001.pdf [file materials-13-00245-s001.pdf]

Supplementary Materials

# A Study of the Effect of 5 at.% Sn on the Micro-Structure and Isothermal Oxidation at 800 and 1200 °C of Nb-24Ti-18Si Based Alloys with Al and/or Cr Additions

Zhen Xu, Claire Utton and Panos Tsakirooulos \*

Department of Materials Science and Engineering, Sir Robert Hadfield Building,  
The University of Sheffield, Mappin Street, Sheffield S1 3JD, UK; zhen\_xu@outlook.com (Z.X.),  
c.utton@sheffield.ac.uk (C.U.)

\* Correspondence: p.tsakirooulos@sheffield.ac.uk

**Table S1.** Calibration standards and their compositions for the EPMA analyses.

| Elements | Reference Materials | Composition of the reference materials (wt.%)           |
|----------|---------------------|---------------------------------------------------------|
| Nb       | Nb                  | Nb: 100%                                                |
| Ti       | Rutile              | Ti: 59.34%, O: 39.89%, Mg: 0.01%, Fe: 0.59%, Nb: 0.17%  |
| Si       | Zircon              | Si: 15.24%, Mn: 0.03%, Zr: 49.14%, Hf: 0.82%, O: 34.77% |
| Al       | Spinel              | Mg: 17.08%, Al: 37.93%, O: 44.99 %                      |
| Cr       | Cr                  | Cr: 100%                                                |
| Sn       | Sn                  | Sn: 100%                                                |
| O        | Forsterite          | O: 45.5%, Mg: 34.5%, Si: 20.0%                          |

**Table S2.** Analysis data (at.%) of the as cast and heat treated alloy ZX4 (average values in bold numbers).

|                                 | Nb         | Ti         | Si         | Cr         | Sn         |
|---------------------------------|------------|------------|------------|------------|------------|
| As cast                         |            |            |            |            |            |
| Surface*                        | 46.1 ± 0.3 | 24.8 ± 0.3 | 19.5 ± 0.5 | 4.7 ± 0.1  | 4.9 ± 0.2  |
|                                 | 45.6–46.5  | 24.3–25.3  | 18.8–20.4  | 4.4–4.9    | 4.8–5.3    |
| Bulk*                           | 46.5 ± 0.3 | 24.2 ± 0.9 | 20.3 ± 1.8 | 4.0 ± 1.1  | 5.0 ± 0.4  |
|                                 | 45.8–46.7  | 22.2–25.3  | 17.8–22.0  | 3.5–4.9    | 4.2–5.6    |
| Bottom*                         | 44.7 ± 0.6 | 27.3 ± 1.0 | 16.7 ± 1.4 | 6.1 ± 0.7  | 5.2 ± 0.2  |
|                                 | 44.1–45.7  | 25.7–28.8  | 14.7–19.1  | 5.2–7.1    | 4.9–5.6    |
| Nb <sub>ss</sub>                | 44.5 ± 2.6 | 35.0 ± 1.6 | 3.6 ± 0.8  | 11.3 ± 0.9 | 5.6 ± 0.5  |
|                                 | 40.3–46.8  | 33.3–37.7  | 2.2–4.5    | 10.2–12.1  | 4.7–6.1    |
| Nb <sub>3</sub> Sn              | 55.8 ± 0.4 | 22.3 ± 0.5 | 7.5 ± 0.5  | 2.5 ± 0.3  | 11.9 ± 0.7 |
|                                 | 55.5–56.4  | 21.6–23.0  | 6.8–8.4    | 2.2–3.0    | 10.7–12.5  |
| Ti-rich                         | 41.1 ± 0.4 | 22.1 ± 0.9 | 33.1 ± 1.4 | 1.9 ± 0.5  | 1.8 ± 0.2  |
|                                 | 40.7–41.7  | 20.9–23.4  | 31.1–34.3  | 1.1–2.7    | 1.4–2.1    |
| Nb <sub>5</sub> Si <sub>3</sub> | 45.2 ± 0.5 | 17.2 ± 0.4 | 34.8 ± 0.2 | 0.9 ± 0.1  | 1.9 ± 0.2  |
|                                 | 44.5–45.8  | 16.7–17.9  | 34.5–35.2  | 0.8–1.1    | 1.7–2.2    |

|                                 |                         |                         |                         |                         |                         |
|---------------------------------|-------------------------|-------------------------|-------------------------|-------------------------|-------------------------|
| Laves phase                     | 20.8 ± 2.3<br>18.7–24.4 | 28.3 ± 4.2<br>21.0–34.7 | 10.7 ± 2.2<br>8.5–12.0  | 38.4 ± 3.9<br>34.0–44.8 | 1.8 ± 0.7<br>0.7–3.0    |
| Heat treated                    |                         |                         |                         |                         |                         |
| Bulk*                           | 44.6 ± 0.5<br>43.9–45.6 | 26.0 ± 0.5<br>25.0–26.4 | 20.0 ± 0.5<br>19.1–20.7 | 4.3 ± 0.2<br>4.1–4.6    | 5.1 ± 0.4<br>4.6–5.5    |
| Nb <sub>ss</sub>                | 52.1 ± 0.8<br>50.9–53.4 | 33.3 ± 0.8<br>32.3–34.2 | 0.7 ± 0.1<br>0.5–1.0    | 9.0 ± 0.4<br>8.7–9.7    | 4.9 ± 0.2<br>4.7–5.2    |
| Nb <sub>3</sub> Sn              | 49.8 ± 0.3<br>49.3–50.4 | 26.3 ± 0.3<br>25.8–26.8 | 5.2 ± 0.5<br>4.7–6.5    | 5.0 ± 0.2<br>4.6–5.2    | 13.7 ± 0.2<br>13.3–13.9 |
| Nb <sub>5</sub> Si <sub>3</sub> | 42.9 ± 0.9<br>41.7–44.4 | 19.5 ± 0.8<br>18.4–21.0 | 35.6 ± 0.6<br>34.8–36.2 | 0.5 ± 0.1<br>0.4–0.8    | 1.5 ± 0.4<br>1.1–2.2    |

\* Large area analysis.

**Table S3.** Analysis data (at.%) of the as cast and heat treated alloy ZX6 (average values in bold numbers).

|                                            | <b>Nb</b>               | <b>Ti</b>               | <b>Si</b>               | <b>Al</b>            | <b>Sn</b>            |
|--------------------------------------------|-------------------------|-------------------------|-------------------------|----------------------|----------------------|
| As cast                                    |                         |                         |                         |                      |                      |
| Top*                                       | 44.8 ± 0.1<br>44.6–45.1 | 26.3 ± 0.3<br>25.8–26.9 | 19.2 ± 0.3<br>18.8–19.7 | 4.8 ± 0.2<br>4.4–5.1 | 4.9 ± 0.2<br>4.7–5.2 |
| Bulk*                                      | 45.1 ± 2.7<br>40.6–49.6 | 26.0 ± 1.7<br>23.3–29.4 | 18.9 ± 1.5<br>16.1–21.5 | 5.1 ± 0.3<br>4.7–5.6 | 4.9 ± 0.4<br>3.7–5.4 |
| Bottom*                                    | 49.9 ± 0.3<br>49.4–50.3 | 23.2 ± 0.6<br>22.1–24.4 | 16.9 ± 0.5<br>16.0–18.0 | 4.9 ± 0.2<br>4.5–5.1 | 5.1 ± 0.1<br>5.0–5.4 |
| Nb <sub>ss</sub>                           | 52.4 ± 3.6<br>45.9–56.9 | 34.1 ± 3.2<br>30.2–38.9 | 2.8 ± 0.7<br>1.8–4.3    | 5.9 ± 0.2<br>5.5–6.1 | 4.8 ± 0.3<br>4.5–5.4 |
| Nb <sub>5</sub> Si <sub>3</sub>            | 45.7 ± 1.3<br>44.5–47.4 | 17.1 ± 1.4<br>15.3–18.3 | 32.5 ± 0.8<br>31.5–33.3 | 2.9 ± 0.5<br>2.2–3.5 | 1.8 ± 0.4<br>1.3–2.4 |
| Ti rich<br>Nb <sub>5</sub> Si <sub>3</sub> | 42.2 ± 1.2<br>40.1–43.5 | 20.9 ± 1.3<br>19.4–23.4 | 31.3 ± 0.3<br>30.6–31.7 | 4.0 ± 0.2<br>3.6–4.2 | 1.6 ± 0.2<br>1.2–1.8 |
| Nb <sub>3</sub> Sn                         | 54.8 ± 1.4<br>52.7–57.2 | 24.0 ± 1.2<br>21.6–25.8 | 6.6 ± 0.4<br>6.1–7.3    | 5.9 ± 0.5<br>5.2–6.8 | 8.7 ± 1.0<br>7.3–9.9 |
| Heat treated                               |                         |                         |                         |                      |                      |
| Bulk*                                      | 47.9 ± 0.2<br>47.6–48.2 | 23.9 ± 0.6<br>23.1–25.0 | 19.3 ± 0.9<br>17.7–21.2 | 4.5 ± 0.2<br>4.1–4.9 | 4.4 ± 0.2<br>4.0–4.7 |
| Nb <sub>5</sub> Si <sub>3</sub>            | 46.5 ± 0.8<br>45.6–47.5 | 16.8 ± 0.7<br>15.8–17.6 | 33.2 ± 0.1<br>33.0–33.4 | 2.1 ± 0.1<br>2.0–2.4 | 1.4 ± 0.1<br>1.3–1.6 |

|                                 |            |            |            |           |           |
|---------------------------------|------------|------------|------------|-----------|-----------|
| Ti-rich                         | 44.0 ± 0.8 | 19.2 ± 0.6 | 34.2 ± 0.4 | 1.7 ± 0.2 | 0.9 ± 0.2 |
| Nb <sub>5</sub> Si <sub>3</sub> | 43.2–45.6  | 18.1–19.8  | 33.5–34.6  | 1.4–2.0   | 0.7–1.2   |
| Nb <sub>3</sub> Sn              | 55.0 ± 0.5 | 25.1 ± 0.6 | 4.7 ± 0.3  | 7.0 ± 0.2 | 8.2 ± 0.1 |
|                                 | 53.9–55.5  | 24.3–26.3  | 4.2–5.0    | 6.7–7.3   | 8.0–8.4   |

\* Large area analysis.

**Table S4.** Analysis data (at.%) of the as cast and heat treatment alloy ZX8 (average values in bold numbers).

| As Cast                                 | Nb         | Ti         | Si         | Cr         | Al        | Sn        |
|-----------------------------------------|------------|------------|------------|------------|-----------|-----------|
| Surface*                                | 41.3 ± 0.7 | 28.1 ± 1.1 | 14.1 ± 1.9 | 6.4 ± 0.7  | 5.2 ± 0.2 | 4.9 ± 0.3 |
|                                         | 40.4–43.0  | 25.8–30.0  | 10.9–18.8  | 4.8–8.0    | 4.9–5.6   | 4.3–5.3   |
| Bulk*                                   | 45.8 ± 0.9 | 21.4 ± 0.9 | 19.7 ± 1.0 | 4.5 ± 0.8  | 4.3 ± 0.5 | 4.3 ± 0.2 |
|                                         | 43.3–46.6  | 20.3–23.9  | 18.0–20.9  | 3.3–5.3    | 3.7–5.2   | 4.0–4.8   |
| Bottom*                                 | 45.4 ± 0.4 | 22.1 ± 0.3 | 17.7 ± 0.5 | 5.5 ± 0.3  | 4.8 ± 0.2 | 4.5 ± 0.1 |
|                                         | 44.9–46.3  | 21.6–22.6  | 16.9–18.6  | 5.0–6.2    | 4.6–5.1   | 4.3–4.8   |
| Nb <sub>5</sub> Si <sub>3</sub>         | 42.0 ± 0.6 | 20.6 ± 0.5 | 31.9 ± 0.9 | 1.1 ± 0.2  | 2.6 ± 0.5 | 1.8 ± 0.4 |
|                                         | 41.2–43.2  | 19.9–21.4  | 30.7–33.3  | 0.8–1.4    | 1.7–3.2   | 1.2–2.2   |
| Ti-rich Nb <sub>5</sub> Si <sub>3</sub> | 35.2 ± 1.1 | 27.5 ± 1.2 | 29.2 ± 0.9 | 2.6 ± 0.6  | 3.7 ± 0.2 | 1.8 ± 0.2 |
|                                         | 33.2–36.6  | 26.2–29.9  | 27.5–30.0  | 1.9–3.6    | 3.3–4.0   | 1.6–2.3   |
| Nb <sub>3</sub> Sn                      | 50.3 ± 1.3 | 26.2 ± 1.1 | 5.3 ± 0.2  | 3.4 ± 0.3  | 5.2 ± 0.4 | 9.6 ± 0.6 |
|                                         | 48.0–52.0  | 24.8–28.3  | 5.0–5.6    | 2.9–4.1    | 4.6–6.2   | 8.2–10.1  |
| Laves phase                             | 27.0 ± 1.6 | 20.8 ± 0.6 | 9.6 ± 1.8  | 38.8 ± 2.5 | 2.7 ± 0.4 | 1.1 ± 0.4 |
|                                         | 25.9–28.8  | 20.1–21.3  | 8.4–11.7   | 36.7–41.6  | 2.3–3.1   | 0.7–1.6   |
| Heat treated                            | Nb         | Ti         | Si         | Cr         | Al        | Sn        |
| Bulk*                                   | 46.6 ± 0.7 | 21.1 ± 0.8 | 18.6 ± 1.1 | 5.1 ± 0.4  | 4.0 ± 0.2 | 4.6 ± 0.3 |
|                                         | 45.9–47.5  | 20.3–22.2  | 17.4–20.4  | 4.6–5.7    | 3.8–4.5   | 4.0–5.0   |
| Nb <sub>5</sub> Si <sub>3</sub>         | 45.3 ± 0.6 | 17.1 ± 0.7 | 34.3 ± 0.2 | 0.7 ± 0.1  | 1.5 ± 0.2 | 1.1 ± 0.2 |
|                                         | 44.7–46.1  | 16.1–17.7  | 34.1–34.5  | 0.6–0.9    | 1.3–1.7   | 0.9–1.2   |
| Ti rich Nb <sub>5</sub> Si <sub>3</sub> | 34.7 ± 0.6 | 27.0 ± 0.9 | 32.5 ± 0.6 | 2.3 ± 0.2  | 3.2 ± 0.1 | 0.3 ± 0.1 |
|                                         | 33.9–35.4  | 26.2–28.4  | 31.8–33.3  | 2.0–2.6    | 3.0–3.3   | 0.3–0.4   |
| Nb <sub>3</sub> Sn                      | 51.9 ± 0.4 | 22.5 ± 0.6 | 4.8 ± 0.2  | 6.3 ± 0.6  | 5.8 ± 0.2 | 8.7 ± 0.1 |
|                                         | 51.4–52.5  | 21.6–23.4  | 4.2–5.0    | 5.8–7.6    | 5.4–6.1   | 8.5–8.9   |
| Nb <sub>ss</sub>                        | 50.4 ± 2.7 | 32.0 ± 2.4 | 0.6 ± 0.3  | 9.2 ± 0.5  | 6.0 ± 0.5 | 1.8 ± 0.2 |
|                                         | 48.1–54.6  | 28.5–34.4  | 0.4–1.1    | 8.4–9.6    | 5.1–6.5   | 1.5–2.0   |
| Laves phase                             | 27.3 ± 0.4 | 13.7 ± 3.6 | 8.3 ± 1.89 | 48.5 ± 2.2 | 1.9 ± 0.2 | 0.3 ± 0.2 |
|                                         | 26.6–27.8  | 11.2–20.0  | 6.1–10.4   | 45.1–50.6  | 1.6–2.1   | 0.1–0.6   |

\* Large area analysis.
